# Supplementary material for: Shape-memory capability of binary multiblock copolymer blends with hard and switching domains provided by different components
Source: Royal Society of Chemistry journal article supplement (doi:10.1039/b810583a), 2008-12-02
Supplement: b810583a.pdf [file b810583a.pdf]

# Supplementary data

## Shape-Memory Capability of Binary Multiblock Copolymer Blends with Hard and Switching Domains Provided by Different Components

Marc Behl, Ute Ridder<sup>1</sup>, Yakai Feng<sup>2</sup>, Steffen Kelch<sup>3</sup>, Andreas Lendlein\*

*Institute of Polymer Research, GKSS Research Center Geesthacht GmbH, 14513 Teltow, Germany*

*\*To whom correspondence should be addressed. Email: andreas.lendlein@gkss.de, Fax: (+49) 3328-352452*

<sup>1</sup> *present address: Freudenberg Forschungsdienste KG, 69465 Weinheim, Germany*

<sup>2</sup> *present address: Department of Polymer Science and Technology, Tianjin University, 92 Weijin Road, Tianjin 300072, People Republic of China*

<sup>3</sup> *present address: Sika Technology AG, Tüffenwies 16, CH-8048 Zürich, Switzerland*

**Table S1a.** Mechanical properties of polymer blends obtained by co-precipitation method determined in tensile tests. E: E-Modulus,  $\sigma_y$ : stress at yield,  $\epsilon_y$ : elongation at yield,  $\sigma_b$ : stress at break,  $\epsilon_b$ : elongation at break.

| Polymer blend ID <sup>a)</sup> | E <sup>b)</sup><br>(MPa) | $\sigma_y$ <sup>b)</sup><br>(MPa) | $\epsilon_y$ <sup>b)</sup><br>(%) | $\sigma_b$ <sup>b)</sup><br>(MPa) | $\epsilon_b$ <sup>b)</sup><br>(%) | E <sup>c)</sup><br>(MPa) | $\sigma_b$ <sup>c)</sup><br>(MPa) | $\epsilon_b$ <sup>c)</sup><br>(%) |
|--------------------------------|--------------------------|-----------------------------------|-----------------------------------|-----------------------------------|-----------------------------------|--------------------------|-----------------------------------|-----------------------------------|
| PDA(42)/PCA(47)[21/24/42]      | 15.5 ± 1.3               | -                                 | -                                 | 12.5 ± 3.5                        | 1,295 ± 335                       | 2.3 ± 0.4                | 1.1 ± 0.2                         | 240 ± 40                          |
| PDA(42)/PCA(47)[28/16/42]      | 23.3 ± 3.6               | -                                 | -                                 | 9.5 ± 2.1                         | 1,070 ± 30                        | 4.5 ± 0.4                | 1.9 ± 0.2                         | 270 ± 20                          |
| PDA(42)/PCA(47)[34/10/44]      | 16.8 ± 2.2               | -                                 | -                                 | 5.5 ± 0.7                         | 445 ± 105                         | 7.2 ± 1.5                | 2.5 ± 0.1                         | 210 ± 70                          |
| PDA(42)/PCA(68)[14/45/28]      | 32.7 ± 1.3               | 4.3 ± 0.8                         | 35 ± 7                            | 12.5 ± 0.2                        | 860 ± 95                          | 0.7 ± 0.5                | 0.8 ± 0.2                         | 1,055 ± 385                       |
| PDA(42)/PCA(68)[21/34/32]      | 25.6 ± 0.8               | 5.1 ± 0.2                         | 58 ± 11                           | 9.6 ± 3.0                         | 795 ± 270                         | 2.6 ± 0.1                | 1.0 ± 0.1                         | 325 ± 60                          |
| PDA(42)/PCA(68)[28/22/36]      | 24.5 ± 2.1               | -                                 | -                                 | 8.9 ± 1.6                         | 925 ± 180                         | 4.1 ± 0.6                | 2.0 ± 0.2                         | 320 ± 105                         |
| PDA(42)/PCA(68)[34/14/40]      | 16.9 ± 0.8               | -                                 | -                                 | 10.5 ± 0.7                        | 1,280 ± 1                         | 5.9 ± 0.1                | 1.9 ± 0.1                         | 75 ± 1                            |
| PDA(50)/PCA(47)[25/24/37]      | 15.9 ± 2.4               | 4.9 ± 0.0                         | 51 ± 3                            | 9.8 ± 0.8                         | 750 ± 110                         | 6.5 ± 0.8                | 2.3 ± 0.1                         | 410 ± 15                          |
| PDA(50)/PCA(47)[33/16/37]      | 20.5 ± 4.6               | 5.6 ± 0.4                         | 51 ± 10                           | 10.6 ± 1.1                        | 705 ± 160                         | 10.0 ± 1.7               | 2.7 ± 0.0                         | 340 ± 10                          |
| PDA(50)/PCA(47)[40/9/37]       | 32.0 ± 2.0               | 6.3 ± 0.2                         | 58 ± 6                            | 11.8 ± 0.6                        | 845 ± 90                          | 14.9 ± 2.8               | 5.0 ± 0.2                         | 575 ± 90                          |
| PDA(50)/PCA(68)[17/45/25]      | 33.9 ± 1.8               | -                                 | -                                 | 9.1 ± 0.2                         | 970 ± 100                         | 1.7 ± 0.1                | 1.2 ± 0.0                         | 550 ± 95                          |
| PDA(50)/PCA(68)[25/34/28]      | 36.0 ± 2.0               | -                                 | -                                 | 13.6 ± 1.2                        | 1,130 ± 150                       | 4.9 ± 0.5                | 2.2 ± 0.1                         | 460 ± 70                          |
| PDA(50)/PCA(68)[34/22/31]      | 37.0 ± 2.1               | 5.1 ± 0.3                         | 78 ± 9                            | 13.8 ± 1.8                        | 1,055 ± 25                        | 7.1 ± 1.0                | 3.0 ± 0.1                         | 465 ± 65                          |
| PDA(50)/PCA(68)[40/14/34]      | 41.7 ± 3.1               | 5.8 ± 0.3                         | 72 ± 12                           | 15.5 ± 1.6                        | 1,510 ± 20                        | 17.6 ± 3.1               | 5.0 ± 0.2                         | 480 ± 40                          |

a) The three numbers in squared brackets of the sample ID give the content in wt% of PPDO, PCL and PADOH in the binary polymer blends.

b) determined at 20 °C

c) determined at 50 °C

**Table S1b.** Mechanical properties of polymer blends obtained by co-extrusion method determined in tensile tests. E: E-Modulus,  $\sigma_y$ : stress at yield,  $\epsilon_y$ : elongation at yield,  $\sigma_b$ : stress at break,  $\epsilon_b$ : elongation at break.

| Polymer blend ID <sup>a)</sup> | E <sup>b)</sup><br>(MPa) | $\sigma_y$ <sup>b)</sup><br>(MPa) | $\epsilon_y$ <sup>b)</sup><br>(%) | $\sigma_b$ <sup>b)</sup><br>(MPa) | $\epsilon_b$ <sup>b)</sup><br>(%) | E <sup>c)</sup><br>(MPa) | $\sigma_b$ <sup>c)</sup><br>(MPa) | $\epsilon_b$ <sup>c)</sup><br>(%) |
|--------------------------------|--------------------------|-----------------------------------|-----------------------------------|-----------------------------------|-----------------------------------|--------------------------|-----------------------------------|-----------------------------------|
| PDA(42)/PCA(47)[21/24/42]      | 23.8 ± 2.4               | -                                 | -                                 | 8.8 ± 0.8                         | 735 ± 60                          | 2.4 ± 0.6                | 0.7 ± 0.1                         | 300 ± 70                          |
| PDA(42)/PCA(47)[28/16/42]      | 24.2 ± 1.1               | -                                 | -                                 | 6.6 ± 0.7                         | 460 ± 35                          | 7.0 ± 0.8                | 1.9 ± 0.2                         | 240 ± 75                          |
| PDA(42)/PCA(47)[34/10/44]      | 27.3 ± 2.4               | -                                 | -                                 | 7.6 ± 0.7                         | 530 ± 65                          | 4.9 ± 0.6                | 1.9 ± 0.5                         | 315 ± 15                          |
| PDA(42)/PCA(68)[14/45/28]      | 36.8 ± 3.7               | 4.5 ± 0.2                         | 33 ± 2                            | 16.4 ± 1.6                        | 820 ± 40                          | 0.3 ± 0.3                | 0.1 ± 0.05                        | 360 ± 60                          |
| PDA(42)/PCA(68)[21/34/32]      | 39.4 ± 1.2               | 4.7 ± 0.1                         | 39 ± 2                            | 11.9 ± 0.4                        | 705 ± 20                          | 1.7 ± 0.2                | 0.5 ± 0.1                         | 375 ± 15                          |
| PDA(42)/PCA(68)[28/22/36]      | 37.2 ± 1.6               | -                                 | -                                 | 8.0 ± 0.4                         | 450 ± 40                          | 3.4 ± 0.9                | 1.6 ± 0.1                         | 375 ± 45                          |
| PDA(42)/PCA(68)[34/14/40]      | 38.4 ± 4.1               | -                                 | -                                 | 6.9 ± 0.3                         | 305 ± 20                          | 6.8 ± 1.5                | 2.5 ± 0.5                         | 255 ± 30                          |
| PDA(50)/PCA(47)[25/24/37]      | 38.0 ± 4.5               | -                                 | -                                 | 12.4 ± 0.8                        | 690 ± 50                          | 8.1 ± 4.1                | 2.9 ± 0.5                         | 320 ± 95                          |
| PDA(50)/PCA(47)[33/16/37]      | 39.4 ± 4.6               | -                                 | -                                 | 14.8 ± 0.8                        | 820 ± 40                          | 7.3 ± 0.6                | 3.0 ± 0.2                         | 465 ± 55                          |
| PDA(50)/PCA(47)[40/9/37]       | 54.1 ± 4.0               | -                                 | -                                 | 13.1 ± 0.4                        | 605 ± 40                          | 12.7 ± 0.7               | 5.0 ± 0.3                         | 525 ± 10                          |
| PDA(50)/PCA(68)[17/45/25]      | 40.5 ± 9.4               | 4.1 ± 0.6                         | 29 ± 3                            | 16.7 ± 0.7                        | 780 ± 35                          | 4.1 ± 1.3                | 1.2 ± 0.6                         | 310 ± 125                         |
| PDA(50)/PCA(68)[25/34/28]      | 45.2 ± 4.9               | 5.2 ± 0.2                         | 35 ± 3                            | 17.6 ± 0.4                        | 755 ± 15                          | 4.7 ± 0.7                | 2.0 ± 0.1                         | 535 ± 115                         |
| PDA(50)/PCA(68)[34/22/31]      | 49.6 ± 3.1               | 6.0 ± 0.1                         | 37 ± 7                            | 13.5 ± 1.0                        | 615 ± 40                          | 9.0 ± 1.4                | 3.0 ± 0.2                         | 410 ± 65                          |
| PDA(50)/PCA(68)[40/14/34]      | 60.3 ± 5.9               | 6.7 ± 0.02                        | 33 ± 6                            | 13.7 ± 0.9                        | 640 ± 1                           | 15.4 ± 4.2               | 5.4 ± 0.1                         | 590 ± 135                         |

a) The three numbers in squared brackets of the sample ID give the content in wt% of PPDO, PCL and PADOH in the polymer blends.

b) determined at 20 °C

c) determined at 50 °C

**Table S2.** Shape-memory properties of binary polymer blends obtained by co-precipitation and co-extrusion method determined in strain-controlled cyclic, thermomechanical tests.  $T_{\text{low}} = 0 \text{ }^{\circ}\text{C}$ ,  $T_{\text{high}} = 50 \text{ }^{\circ}\text{C}$ ,  $\varepsilon_{\text{m}} = 100\%$ ,  $R_f(N)$ : strain fixity rate,  $R_r(N)$ : strain recovery rate,  $N$ : cycle number,  $\bar{R}_{f,1-5}$ : average of  $R_f$  from 1<sup>st</sup> to 5<sup>th</sup> cycle,  $\bar{R}_{r,2-4}$ : average of  $R_r$  from 2<sup>nd</sup> to 4<sup>th</sup> cycle.

| Polymer blend ID <sup>a)</sup> | co-precipitation         |                 |                 |                          | co-extrusion             |                 |                 |                          |
|--------------------------------|--------------------------|-----------------|-----------------|--------------------------|--------------------------|-----------------|-----------------|--------------------------|
|                                | $\bar{R}_{f,1-5}$<br>(%) | $R_r(1)$<br>(%) | $R_r(2)$<br>(%) | $\bar{R}_{r,2-4}$<br>(%) | $\bar{R}_{f,1-5}$<br>(%) | $R_r(1)$<br>(%) | $R_r(2)$<br>(%) | $\bar{R}_{r,2-4}$<br>(%) |
| PDA(42)/PCA(47)[21/24/42]      | 81.9 ± 0.8               | 80.3            | 97.1            | 97.3 ± 0.2               | 86.6 ± 0.5               | 63.8            | 91.7            | 95.2 ± 2.8               |
| PDA(42)/PCA(47)[28/16/42]      | 68.1 ± 0.3               | 73.9            | 96.3            | 98.1 ± 1.6               | 75.8 ± 3.1               | 67.7            | 93.9            | 95.1 ± 1.3               |
| PDA(42)/PCA(47)[34/10/44]      | 66.9 ± 1.0               | 84.7            | 96.8            | 98.9 ± 2.0               | 73.2 ± 2.7               | 70.1            | 92.8            | 95.2 ± 2.1               |
| PDA(42)/PCA(68)[14/45/28]      | 93.7 ± 0.5               | 76.6            | 94.5            | 97.4 ± 3.9               | 98.4 ± 0.4               | 59.5            | 82.2            | 84.0 ± 3.1               |
| PDA(42)/PCA(68)[21/34/32]      | 92.2 ± 0.3               | 73.3            | 96.6            | 98.6 ± 3.6               | 95.7 ± 0.3               | 58.9            | 90.1            | 92.4 ± 2.0               |
| PDA(42)/PCA(68)[28/22/36]      | 84.5 ± 0.3               | 72.8            | 97.2            | 98.2 ± 0.9               | 89.8 ± 1.2               | 68.2            | 92.2            | 96.1 ± 3.5               |
| PDA(42)/PCA(68)[34/14/40]      | 72.8 ± 0.3               | 76.8            | 95.9            | 97.2 ± 1.6               | 87.4 ± 0.3               | 63.9            | 94.5            | 96.6 ± 3.0               |
| PDA(50)/PCA(47)[25/24/37]      | 85.4 ± 2.1               | 63.8            | 95.1            | 95.1 ± 3.0               | 86.3 ± 5.1               | 62.5            | 96.2            | 96.6 ± 0.9               |
| PDA(50)/PCA(47)[33/16/37]      | 80.9 ± 0.3               | 55.0            | 91.0            | 94.6 ± 3.2               | 79.6 ± 0.6               | 71.5            | 97.3            | 98.7 ± 3.6               |
| PDA(50)/PCA(47)[40/9/37]       | 77.8 ± 2.9               | 63.8            | 92.0            | 95.1 ± 3.0               | 73.8 ± 5.4               | 67.7            | 93.9            | 95.8 ± 3.5               |
| PDA(50)/PCA(68)[17/45/25]      | 96.3 ± 0.8               | 58.6            | 95.7            | 94.6 ± 3.3               | 99.1 ± 1.2               | 58.6            | 83.4            | 88.9 ± 4.8               |
| PDA(50)/PCA(68)[25/34/28]      | 90.8 ± 0.6               | 55.3            | 94.4            | 94.0 ± 1.5               | 92.9 ± 0.1               | 61.6            | 93.6            | 95.0 ± 1.7               |
| PDA(50)/PCA(68)[34/22/31]      | 86.4 ± 1.1               | 57.1            | 91.8            | 96.5 ± 5.4               | 89.7 ± 1.8               | 60.0            | 94.2            | 96.0 ± 2.3               |

a) The three numbers in squared brackets of the sample ID give the content in wt% of PPDO, PCL and PADOH in the polymer blends according to calculation.

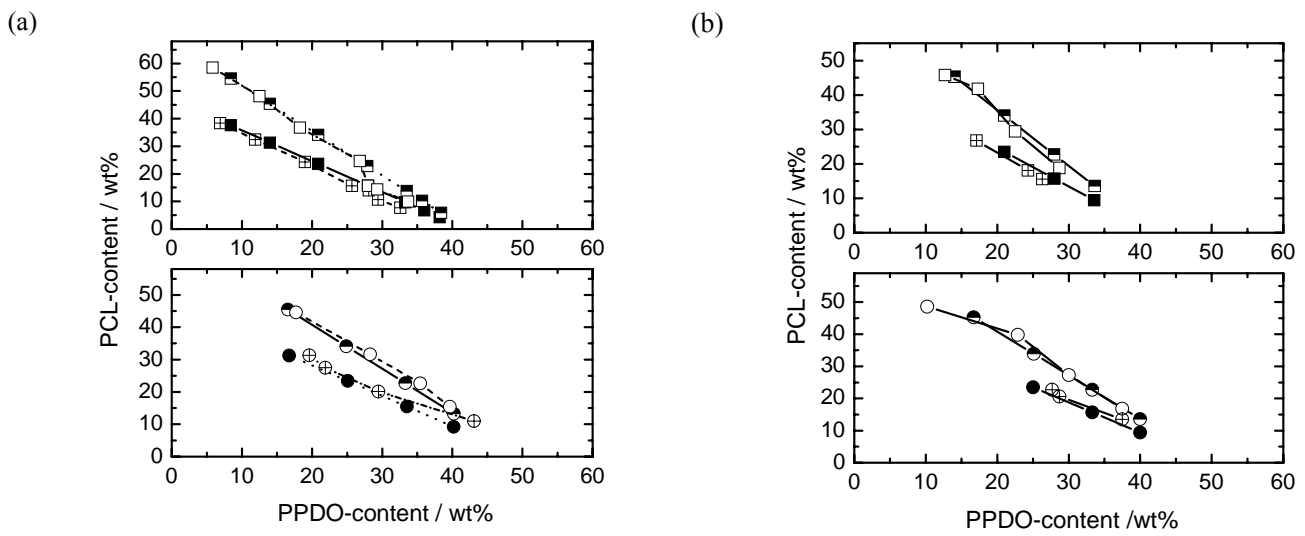

**Fig. S1. Comparison of the initially weighted quantity and the composition determined by  $^1\text{H-NMR}$ -spectroscopy of polymer blends.** The initially weighted quantity of the PDA-polymer and the PCA-polymer vary between 10:1, 6:1, 4:1, 2:1, 1:1, 1:2 and 1:4. (a) Polymer blends from solution and (b) polymer blends from extrusion.

! PDA(42)/PCA(47) (weight in quantity),  $\exists$  PDA(42)/PCA(47) ( $^1\text{H-NMR}$ -spectroscopy),  
 ( PDA(42)/PCA(68) (weight in quantity),  $\nabla$  PDA(42)/PCA(68) ( $^1\text{H-NMR}$ -spectroscopy),  
 , PDA(50)/PCA(47) (weight in quantity), / PDA(50)/PCA(47) ( $^1\text{H-NMR}$ -spectroscopy),  
 3 PDA(50)/PCA(68) (weight in quantity), - PDA(50)/PCA(68) ( $^1\text{H-NMR}$ -spectroscopy)

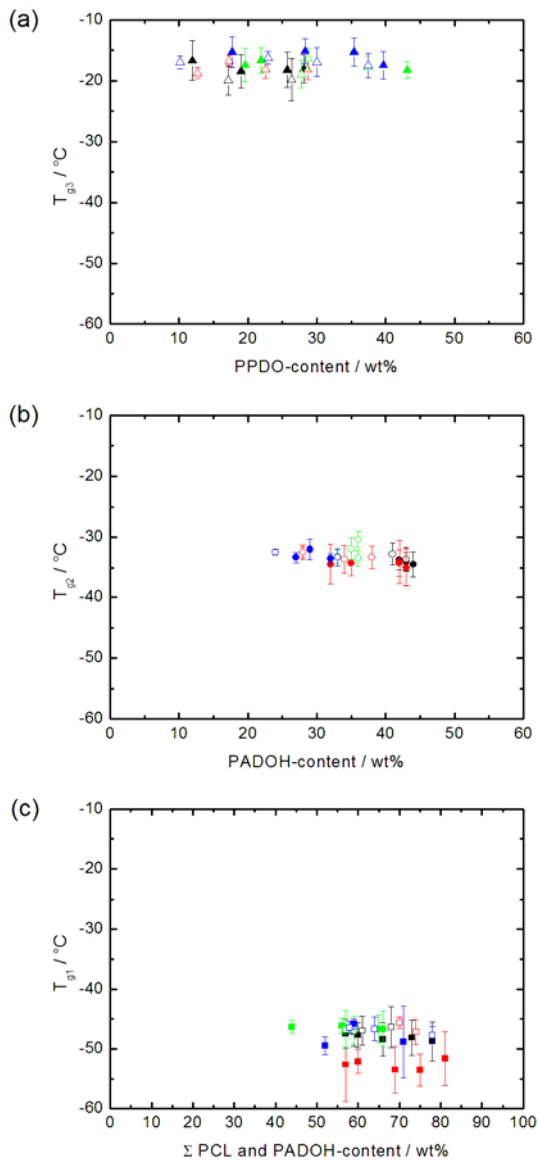

**Fig. S2. Glass transition temperatures  $T_g$  of binary polymer blends from PDA and PCA as a function of weight content in blends.** Filled symbols: polymer blends from co-precipitation: !  $T_{g1}$ ; ,  $T_{g2}$ ; 7  $T_{g3}$ ; hollow symbols: polymer blends from co-extrusion  $\forall$   $T_{g1}$ ; -  $T_{g2}$ ; 8  $T_{g3}$ . The error bars show the range of  $T_g$ . The color indexes the different series: black PDA(42)/PCA(47), red PDA(42)/PCA(68), green PDA(50)/PCA(47), blue PDA(50)/PCA(68). a)  $T_{g1}$  denoted to PPDO; b)  $T_{g2}$  denoted to PADOH;  $T_{g3}$  denoted to PCL

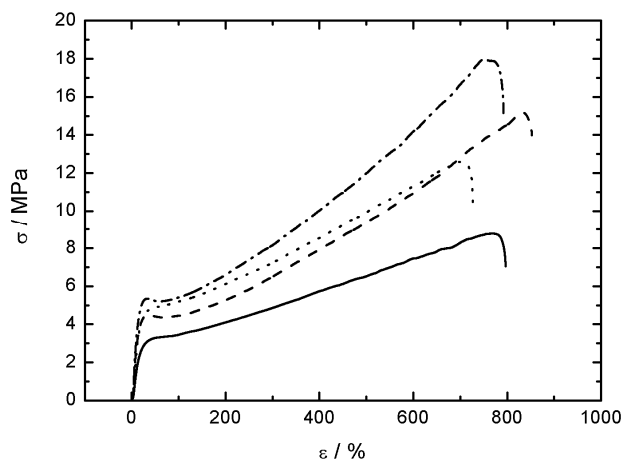

**Fig. S3. Stress-Strain diagrams of extruded polymer blends at room temperature:** solid line = PDA(42)/PCA(47)[21/24/42], dashed line = PDA(42)/PCA(68)[14/45/28], dotted line = PDA(50)/PCA(47)[25/24/37], dash-dotted line = PDA(50)/PCA(68)[25/34/28].

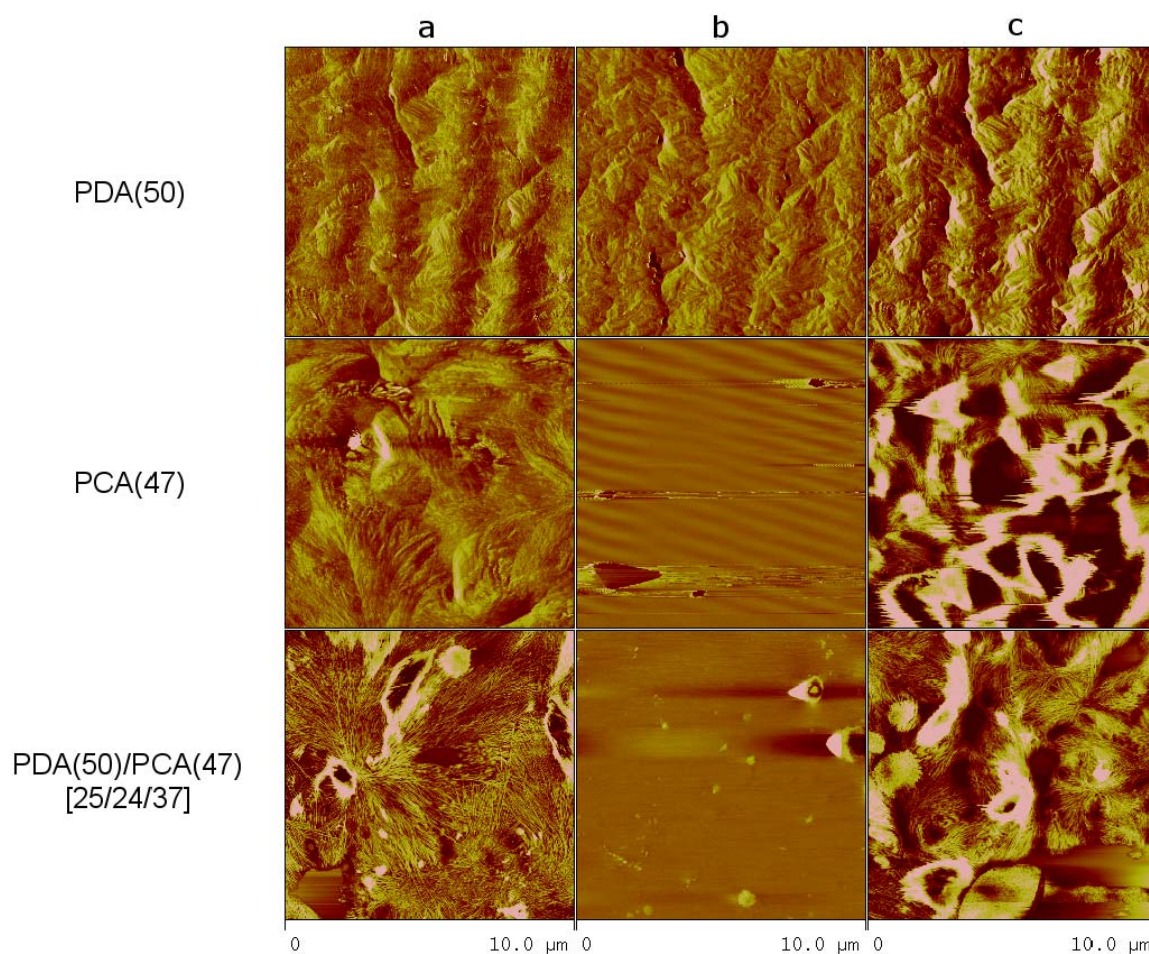

**Fig. S4. AFM phase image of multiblock copolymers PDA(50) and PCA(47) as well as polymer blend PDA(50)/PCA(47)[25/24/37] surfaces at different temperatures. a: room temperature, b: 60 °C, c: room temperature after cooling from 60 °C. Dark area = soft phase, and bright area = stiff phase. (phase image, scan size 10.0 μm, scan rate 1 Hz, samples per line 512, z range 60°)**



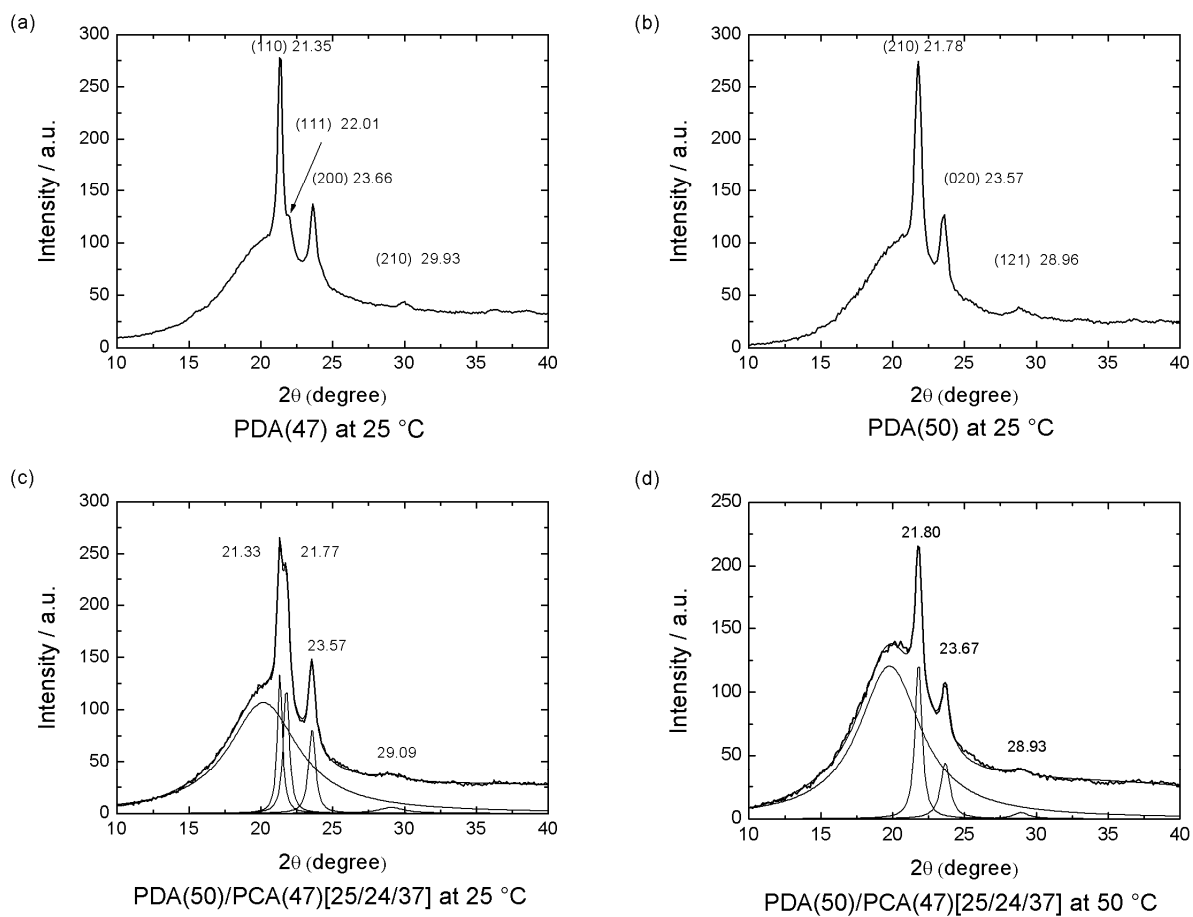

**Fig. S5. WAXS diffractogram of multiblock copolymers (a) PCA(47) and (b) PDA(50) as well as polymer blend (c,d) PDA(50)/PCA(47)[25/24/37].**

## **Video S1**

The video displays programming and recovery applied to two different multi-block copolymers and a binary polymer blend. Left: the PCL-based multiblock copolymer PCA(47); middle: binary blend PDA(50)/PCA(47)[25/24/37] and right: the PPDO-based multi-block copolymer PDA(50). In part 1 of the video the permanent shape at 25 °C is shown. In part 2 the temporary shape was programmed to each sample at 50 °C and is shown at an environmental temperature of 25 °C (part 2). In part 3 the thermally-induced shape-memory effect was triggered by heating to 50 °C (part 3). Only the binary blend of the multi-block copolymers shows a shape-memory effect (sample in the middle).
